# Supplementary material
Source: publisher figshare collection journal article supplement (https://acs.figshare.com/ndownloader/files/4527088)
Supplement: Supplementary file 1 [file 4527088]

## Supplementary information

**Figure S1: Raman spectra of the two types of bilayer graphene, measured at 633 nm excitation.**

(a)

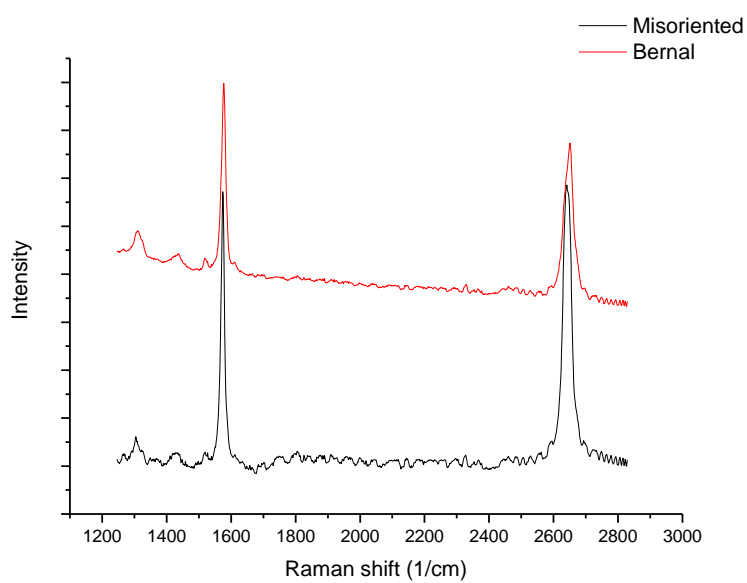

(b)

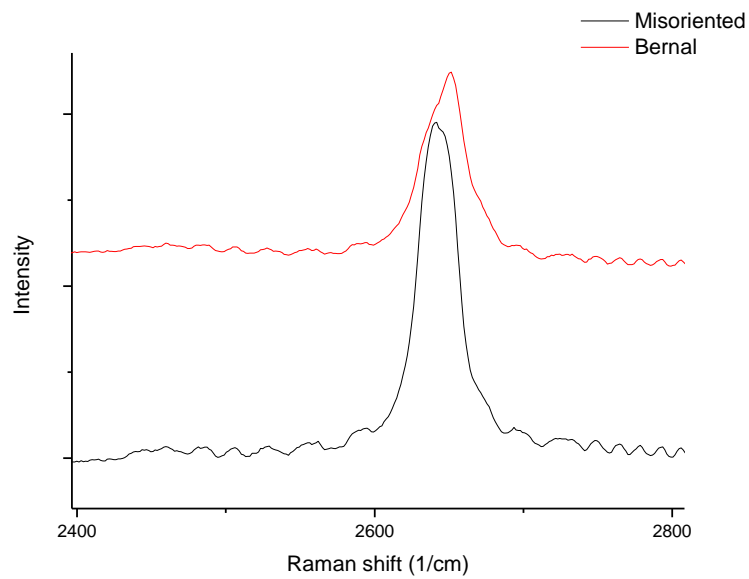

**Figure S2: Photocurrent measurements of Bernal bilayers in electrochemical top-gated configuration, including an AFM image of the sample before top-gating.**

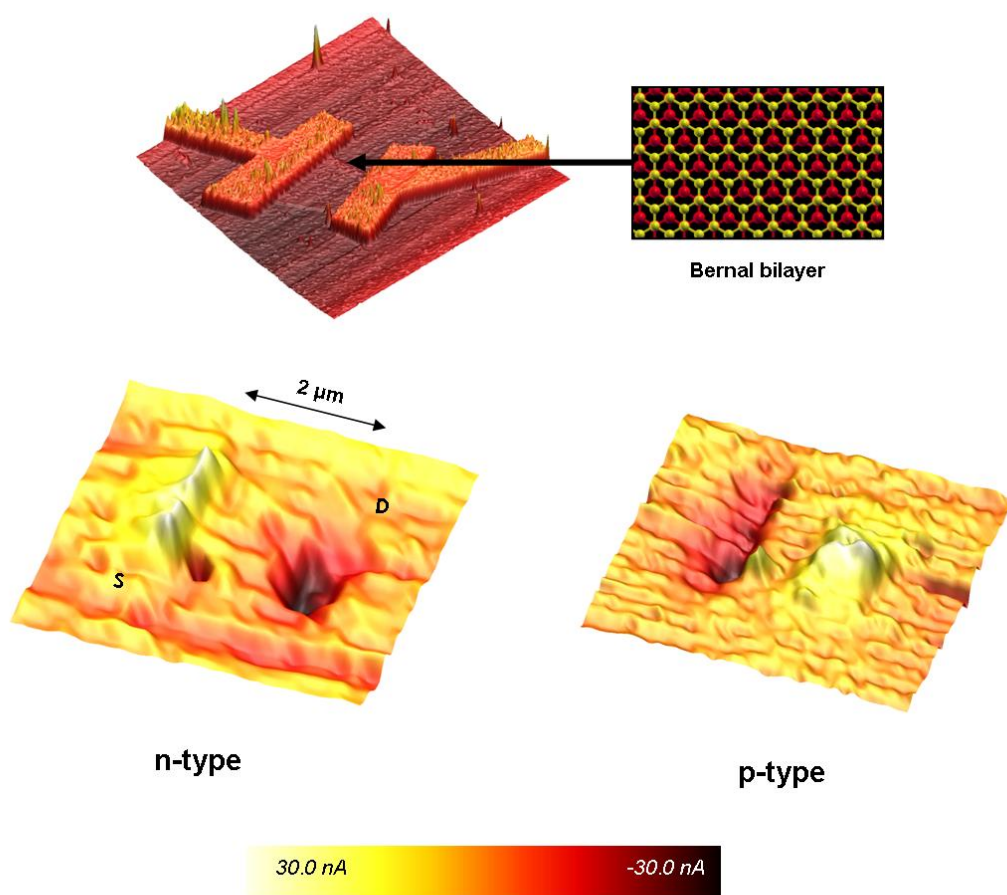

**Figure S3: Comparative plots of the calculated carrier mobilities for the top-gated configurations.**

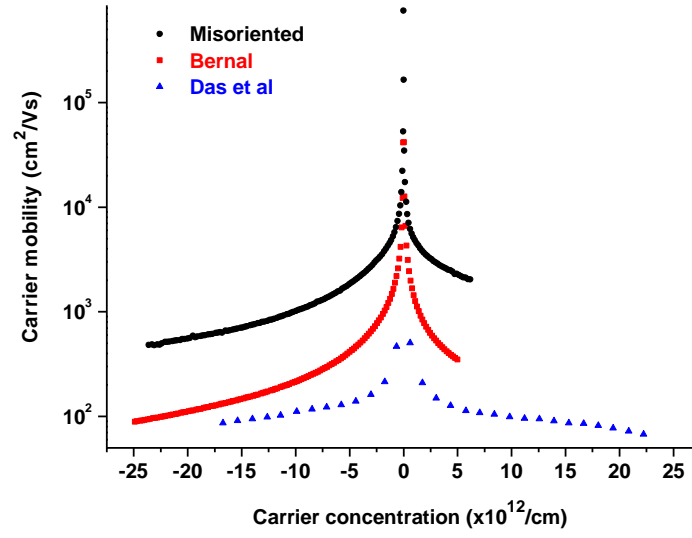

The carrier mobilities of the misoriented and Bernal-stacked bilayer devices were estimated by applying the Drude model  $\mu = (ne\rho)^{-1}$ . The plotted data represent the best values obtained within our sample ensemble. The misoriented bilayer device shows a higher mobility when compared to both Bernal-stacked bilayers and monolayers (taken from Das *et al.*, Nature Nanotechnology **2008**, 3, 210), suggestive of electrostatic screening of the charged impurities on the substrate by the bottom graphene layer.
